# Supplementary material for: Fluorination as tool to improve bioanalytical sensitivity and COX-2-selective antitumor activity of cobalt alkyne complexes
Source: Royal Society of Chemistry journal article supplement (doi:10.1039/c9dt03330k), 2019-01-01

## ELECTRONIC SUPPLEMENTARY INFORMATION

### Fluorination as tool to improve bioanalytical sensitivity and COX-2-selective antitumor activity of cobalt alkyne complexes

Daniel Baecker,<sup>a</sup> Victoria Obermoser,<sup>a</sup> Elisabeth Anna Kirchner,<sup>a</sup> Andrea Hupfau,<sup>a</sup> Brigitte Kircher<sup>b,c</sup> and Ronald Gust\*<sup>a</sup>

---

<sup>a</sup> Department of Pharmaceutical Chemistry, Institute of Pharmacy, CMBI – Center for Molecular Biosciences Innsbruck, University of Innsbruck, CCB – Center for Chemistry and Biomedicine, Innrain 80-82, 6020 Innsbruck, Austria

<sup>b</sup> Immunobiology and Stem Cell Laboratory, Department of Internal Medicine V (Hematology and Oncology), Innsbruck Medical University, Anichstraße 35, 6020 Innsbruck, Austria

<sup>c</sup> Tyrolean Cancer Research Institute, Innrain 66, 6020 Innsbruck, Austria

\* E-mail: [ronald.gust@uibk.ac.at](mailto:ronald.gust@uibk.ac.at); Tel: +43-512-507-58200

## Table of contents

|                                                                                            |     |
|--------------------------------------------------------------------------------------------|-----|
| Synthesis and characterization of intermediate products . . . . .                          | S3  |
| Table S1: Graphite furnace time-temperature program for Co analysis by HR CS AAS . . . . . | S4  |
| Table S2: Graphite furnace time-temperature program for F analysis by HR CS MAS . . . . .  | S4  |
| Table S3: Inhibition of COX-1/2 . . . . .                                                  | S5  |
| Supporting Figure S1: IR spectrum of propargyl-3F-ASS . . . . .                            | S6  |
| Supporting Figure S2: IR spectrum of propargyl-4F-ASS . . . . .                            | S6  |
| Supporting Figure S3: IR spectrum of propargyl-5F-ASS . . . . .                            | S7  |
| Supporting Figure S4: IR spectrum of propargyl-6F-ASS . . . . .                            | S7  |
| Supporting Figure S5: <sup>1</sup> H NMR spectrum of propargyl-3F-ASS . . . . .            | S8  |
| Supporting Figure S6: <sup>1</sup> H NMR spectrum of propargyl-4F-ASS . . . . .            | S9  |
| Supporting Figure S7: <sup>1</sup> H NMR spectrum of propargyl-5F-ASS . . . . .            | S10 |
| Supporting Figure S8: <sup>1</sup> H NMR spectrum of propargyl-6F-ASS . . . . .            | S11 |
| Supporting Figure S9: IR spectrum of 3F-Co-ASS . . . . .                                   | S12 |
| Supporting Figure S10: IR spectrum of 4F-Co-ASS . . . . .                                  | S12 |
| Supporting Figure S11: IR spectrum of 5F-Co-ASS . . . . .                                  | S13 |
| Supporting Figure S12: IR spectrum of 6F-Co-ASS . . . . .                                  | S13 |
| Supporting Figure S13: <sup>1</sup> H NMR spectrum of 3F-Co-ASS . . . . .                  | S14 |
| Supporting Figure S14: <sup>1</sup> H NMR spectrum of 4F-Co-ASS . . . . .                  | S15 |
| Supporting Figure S15: <sup>1</sup> H NMR spectrum of 5F-Co-ASS . . . . .                  | S16 |
| Supporting Figure S16: <sup>1</sup> H NMR spectrum of 6F-Co-ASS . . . . .                  | S17 |

## Synthesis and characterization of intermediate products

### *6-Fluorosalicylic acid (6F-SS)*

From 5.00 g of 2,6-difluorobenzoic acid (31.6 mmol), 5.06 g of NaOH (127 mmol) and 62.9 ml of anhydrous DMSO as solvent (4 h, 130 °C). DMSO was removed under reduced pressure. The residue was dissolved in 250 ml of HCl solution (3%) and stirred at room temperature for 15 min. The product was obtained by filtration and washed with water, followed by drying in a desiccator.

Off-white powder; yield: 1.99 g (12.75 mmol, 40%); mp: 162 °C.

$^1\text{H}$  NMR (200 MHz,  $d_6$ -DMSO):  $\delta$  6.71-6.83 (m, 2H, ArH), 7.37-7.49 (m, 1H, ArH); IR ( $\bar{\nu}$   $\text{cm}^{-1}$ ): 3026-2537 w (COOH), 1651 s (C=O), 1619 s (C=C), 1448 s, 1199 s, 1020 s, 810 s.

### *General procedure for the synthesis of the fluoroacetylsalicylic acids*

2.0 g of fluorosalicylic acid (12.8 mmol) were dissolved in 10 ml of THF and added dropwise under cooling to a mixture of 10 ml of THF, 128 mmol acetic anhydride and 25.6 mmol of TEA. The mixture was stirred at room temperature for about 24 h. 40 ml of water was added and the reaction mixture was acidified with 1M HCl, then extracted three times with diethyl ether. The collected ether phases were washed with water and brine and were dried over sodium sulfate. The solvent was removed under reduced pressure. The product was recrystallized from toluene.

### *3-Fluoroacetylsalicylic acid (3F-ASS)*

Reaction time: 26 h; colorless powder; yield: 1.81 g (9.14 mmol, 71%); mp: 124 °C.

$^1\text{H}$  NMR (200 MHz,  $\text{CDCl}_3$ ):  $\delta$  2.39 (s, 3H,  $\text{CH}_3$ ), 7.25-7.48 (m, 2H, ArH-4, ArH-5), 7.88 (dd,  $^3J = 7.8$  Hz,  $^4J = 1.0$  Hz, 1H, ArH-6); IR ( $\bar{\nu}$   $\text{cm}^{-1}$ ): 2968-2528 w (COOH), 1780 s (C=O), 1691 s (C=O), 1586 m (C=C), 1146 s, 900 s, 758 s.

### *4-Fluoroacetylsalicylic acid (4F-ASS)*

Reaction time: 25.5 h; colorless powder; yield: 1.86 g (9.39 mmol, 73%); mp: 123 °C.

$^1\text{H}$  NMR (200 MHz,  $\text{CDCl}_3$ ):  $\delta$  2.35 (s, 3H,  $\text{CH}_3$ ), 6.89 (dd,  $^3J_{(\text{H-F})} = 8.8$  Hz,  $^4J = 2.4$  Hz, 1H, ArH-3), 7.02-7.12 (m, 1H, ArH-5), 8.16 (ddd,  $^3J_{(\text{H-F})} = 8.8$  Hz,  $^3J = 6.8$  Hz,  $^4J = 2.4$  Hz, 1H, ArH-6); IR ( $\bar{\nu}$   $\text{cm}^{-1}$ ): 3106-2647 w (COOH), 1763 s (C=O), 1690 s (C=O), 1605 m (C=C), 1207 s, 1082 s, 898 s, 857 s.

### 5-Fluoroacetylsalicylic acid (5F-ASS)

Reaction time: 22 h; colorless powder; yield: 1.91 g (9.64 mmol, 75%); mp: 135 °C.

<sup>1</sup>H NMR (200 MHz, CDCl<sub>3</sub>): δ 2.34 (s, 3H, CH<sub>3</sub>), 7.21 (ddd, <sup>3</sup>J<sub>(H-F)}</sub> = 8.8 Hz, <sup>3</sup>J = 4.8 Hz, <sup>4</sup>J = 3.2 Hz, 1H, ArH-4), 7.82-7.38 (m, 1H, ArH-3), 7.80 (dd, <sup>3</sup>J<sub>(H-F)}</sub> = 8.8 Hz, <sup>4</sup>J = 3.2 Hz, 1H, ArH-6); IR ( $\bar{\nu}$  cm<sup>-1</sup>): 2998-2648 w (COOH), 1753 s (C=O), 1692 s (C=O), 1584 m (C=C), 1120 s, 891 s, 843 s.

### 6-Fluoroacetylsalicylic acid (6F-ASS)

Reaction time: 26.5 h; colorless powder; yield: 1.40 g (7.07 mmol, 55%); mp: 106 °C.

<sup>1</sup>H NMR (200 MHz, CDCl<sub>3</sub>): δ 2.32 (s, 3H, CH<sub>3</sub>), 6.95-7.12 (m, 2H, ArH-3, ArH-5), 7.49-7.60 (m, 1H, ArH-4); IR ( $\bar{\nu}$  cm<sup>-1</sup>): 2937-2501 w (COOH), 1769 m (C=O), 1712 s (C=O), 1618 m (C=C), 1197 s, 1025 s, 871 s, 779 s.

Table S1: Graphite furnace time-temperature program for Co analysis by HR CS AAS

| Step | Operation   | Temperature | Heating rate | Hold time | Argon flow |
|------|-------------|-------------|--------------|-----------|------------|
| 1    | Drying      | 80 °C       | 10 °C/s      | 10 s      | Maximal    |
| 2    | Drying      | 100 °C      | 10 °C/s      | 25 s      | Maximal    |
| 3    | Drying      | 120 °C      | 15 °C/s      | 10 s      | Maximal    |
| 4    | Pyrolysis   | 1100 °C     | 200 °C/s     | 20 s      | Maximal    |
| 5    | Auto-zero   | 1100 °C     | 0 °C/s       | 5 s       | Stop       |
| 6    | Atomization | 2300 °C     | 1500 °C/s    | 5 s       | Stop       |
| 7    | Cleaning    | 2600 °C     | 500 °C/s     | 4 s       | Maximal    |

Table S2: Graphite furnace time-temperature program for F analysis by HR CS MAS

| Step | Operation    | Temperature | Heating rate | Hold time | Argon flow |
|------|--------------|-------------|--------------|-----------|------------|
| 1    | Drying       | 120 °C      | 30 °C/s      | 5 s       | Maximal    |
| 2    | Cooling      | 100 °C      | 0 °C/s       | 1 s       | Maximal    |
| 3    | Drying       | 120 °C      | 2 °C/s       | 30 s      | Maximal    |
| 4    | Drying       | 300 °C      | 20 °C/s      | 3 s       | Maximal    |
| 5    | Pyrolysis    | 520 °C      | 200 °C/s     | 10 s      | Maximal    |
| 6    | Auto-zero    | 520 °C      | 0 °C/s       | 5 s       | Stop       |
| 7    | Vaporization | 1400 °C     | 800 °C/s     | 7 s       | Stop       |
| 8    | Cleaning     | 2400 °C     | 1000 °C/s    | 4 s       | Maximal    |

Table S3: Inhibition of COX-1/2

| Compound         | Concentration [ $\mu$ M] | Inhibition COX-1 [%] | Inhibition COX-2 [%] |
|------------------|--------------------------|----------------------|----------------------|
| ASS              | 10                       | 28.80 $\pm$ 3.70     | 0.60 $\pm$ 2.80      |
| ASS              | 100                      | 73.30 $\pm$ 8.70     | 59.40 $\pm$ 8.70     |
| 3F-ASS           | 100                      | 1.61 $\pm$ 1.53      | 47.42 $\pm$ 8.01     |
| 4F-ASS           | 100                      | 85.42 $\pm$ 2.75     | 48.91 $\pm$ 1.14     |
| 5F-ASS           | 100                      | 50.40 $\pm$ 1.33     | 42.95 $\pm$ 2.20     |
| 6F-ASS           | 100                      | 40.49 $\pm$ 0.51     | 51.42 $\pm$ 1.34     |
| Propargyl-ASS    | 100                      | 25.41 $\pm$ 4.44     | 34.49 $\pm$ 4.21     |
| Propargyl-3F-ASS | 100                      | 15.41 $\pm$ 4.06     | 44.75 $\pm$ 0.81     |
| Propargyl-4F-ASS | 100                      | 30.35 $\pm$ 2.80     | 45.09 $\pm$ 0.84     |
| Propargyl-5F-ASS | 100                      | 20.28 $\pm$ 3.34     | 50.19 $\pm$ 1.24     |
| Propargyl-6F-ASS | 100                      | 25.41 $\pm$ 6.68     | 44.15 $\pm$ 0.78     |
| Co-ASS           | 10                       | 82.70 $\pm$ 3.20     | 78.50 $\pm$ 6.10     |
| 3F-Co-ASS        | 10                       | 45.30 $\pm$ 3.90     | 67.70 $\pm$ 3.50     |
| 4F-Co-ASS        | 10                       | 45.00 $\pm$ 5.40     | 73.90 $\pm$ 1.80     |
| 5F-Co-ASS        | 10                       | 38.10 $\pm$ 4.90     | 68.00 $\pm$ 5.70     |
| 6F-Co-ASS        | 10                       | 44.30 $\pm$ 3.10     | 66.80 $\pm$ 1.90     |

Supporting Figure S1: IR spectrum of propargyl-3F-ASS

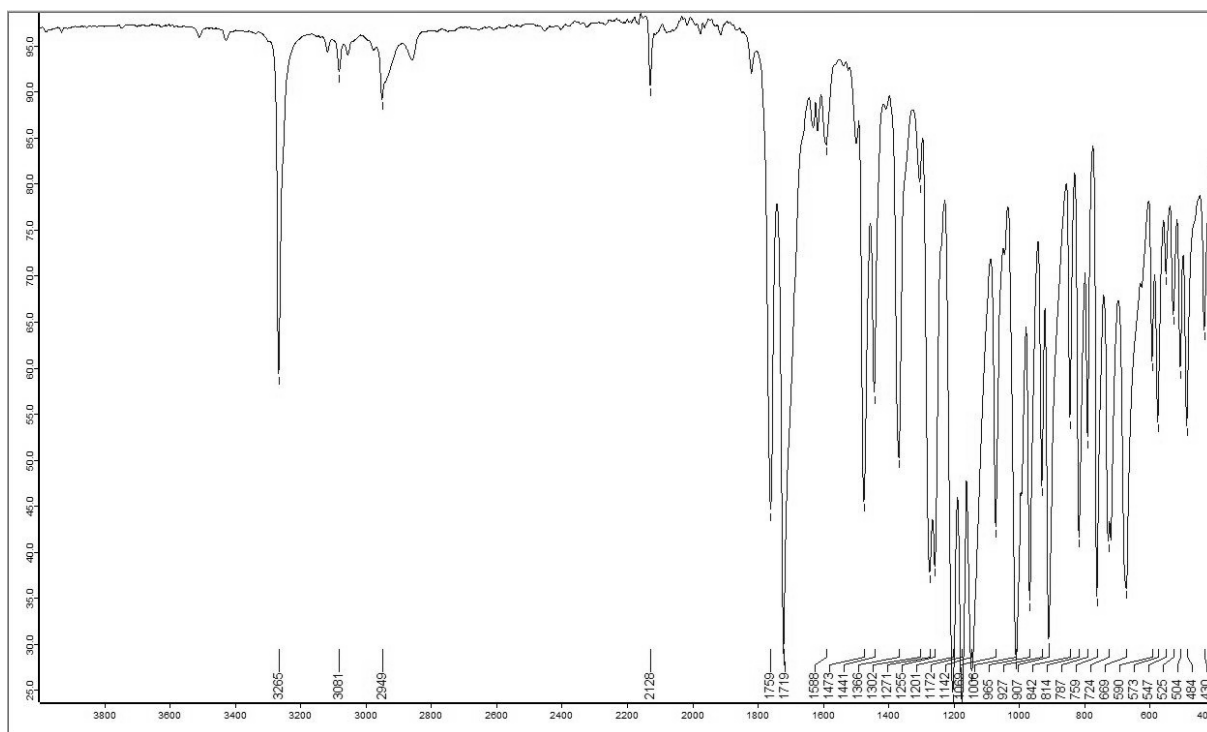

Supporting Figure S2: IR spectrum of propargyl-4F-ASS

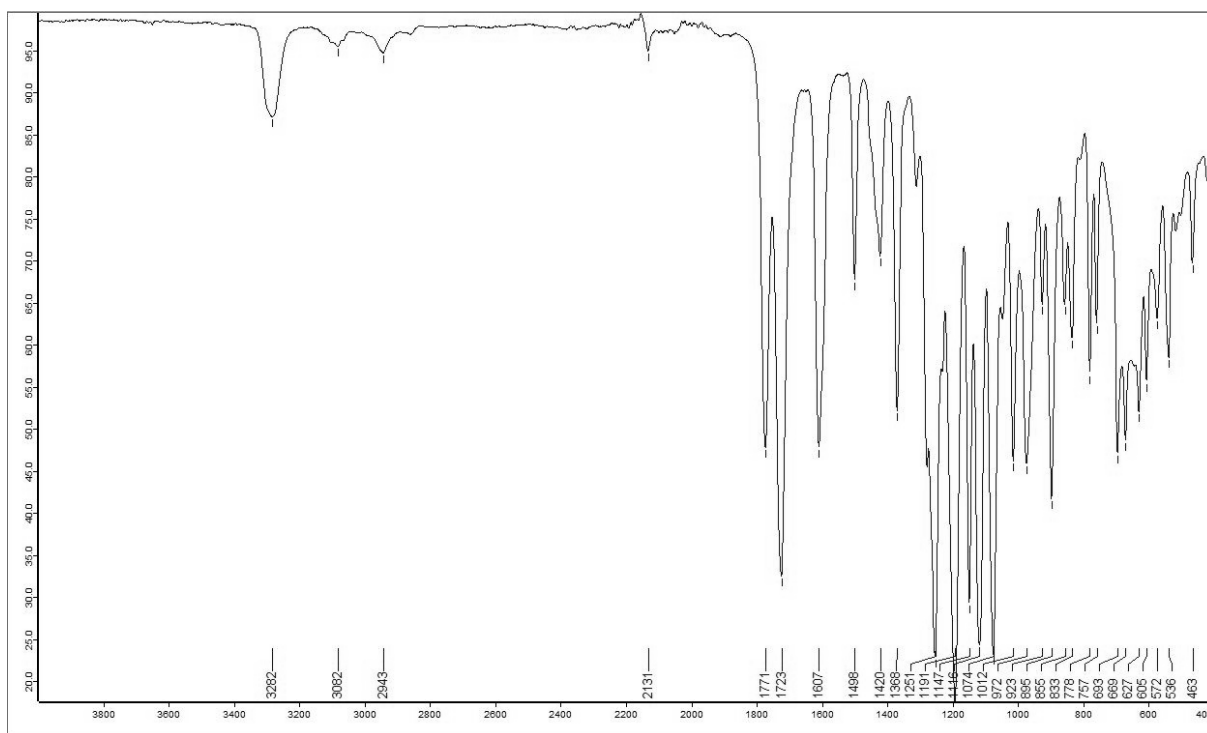

Supporting Figure S3: IR spectrum of propargyl-5F-ASS

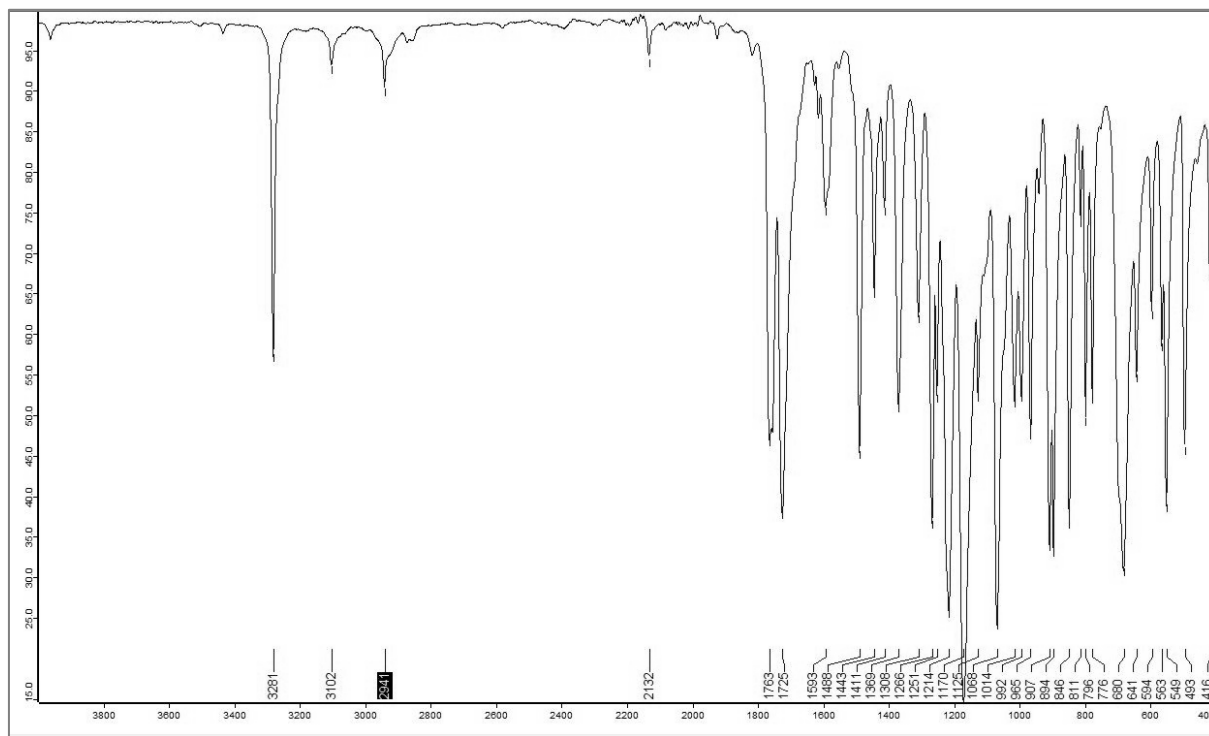

Supporting Figure S4: IR spectrum of propargyl-6F-ASS

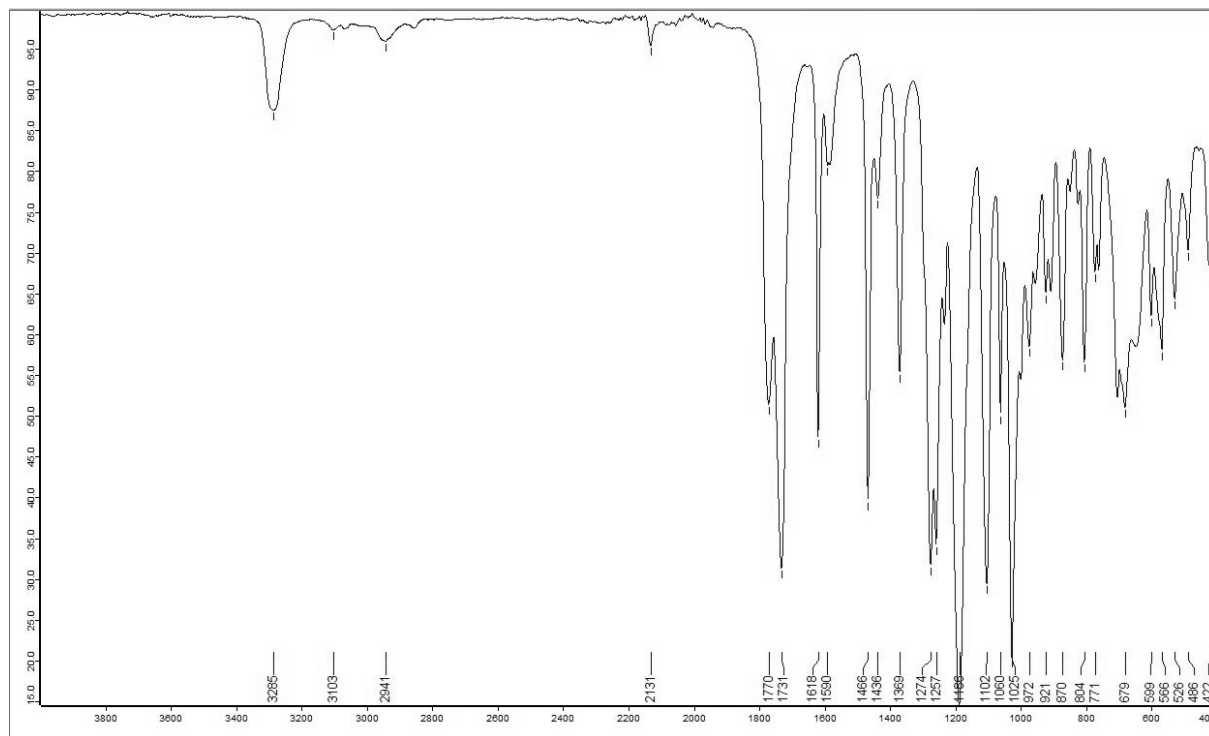

Supporting Figure S5:  $^1\text{H}$  NMR spectrum of propargyl-3F-ASS

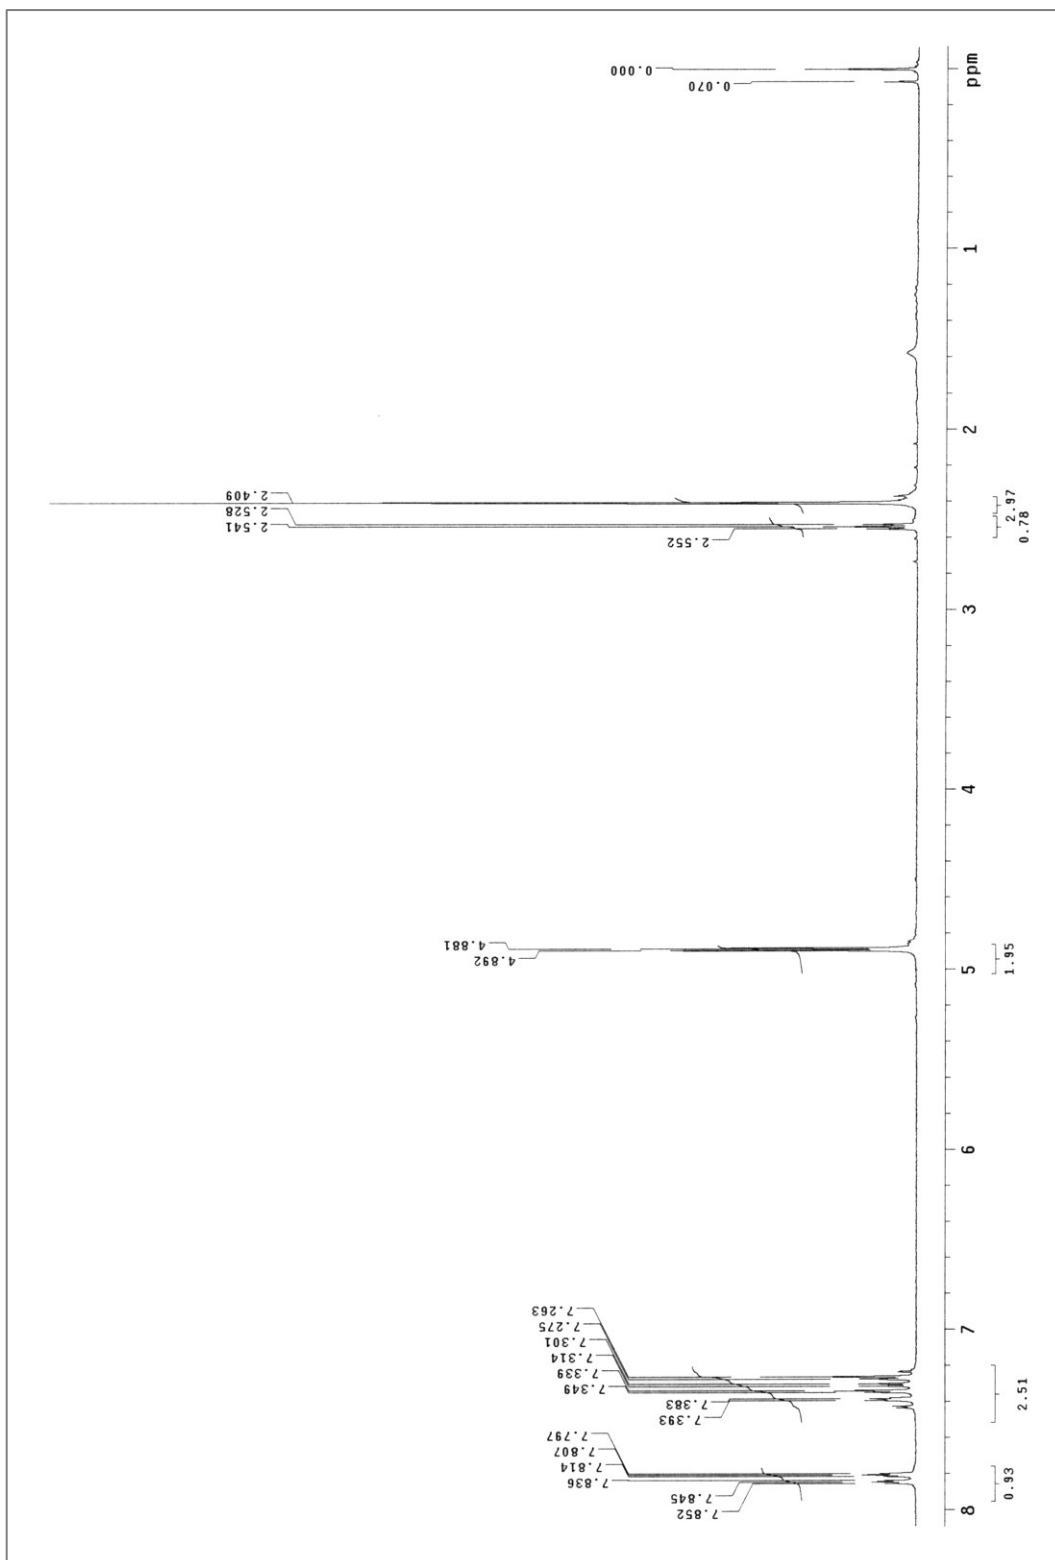



Supporting Figure S6: <sup>1</sup>H NMR spectrum of propargyl-4F-ASS

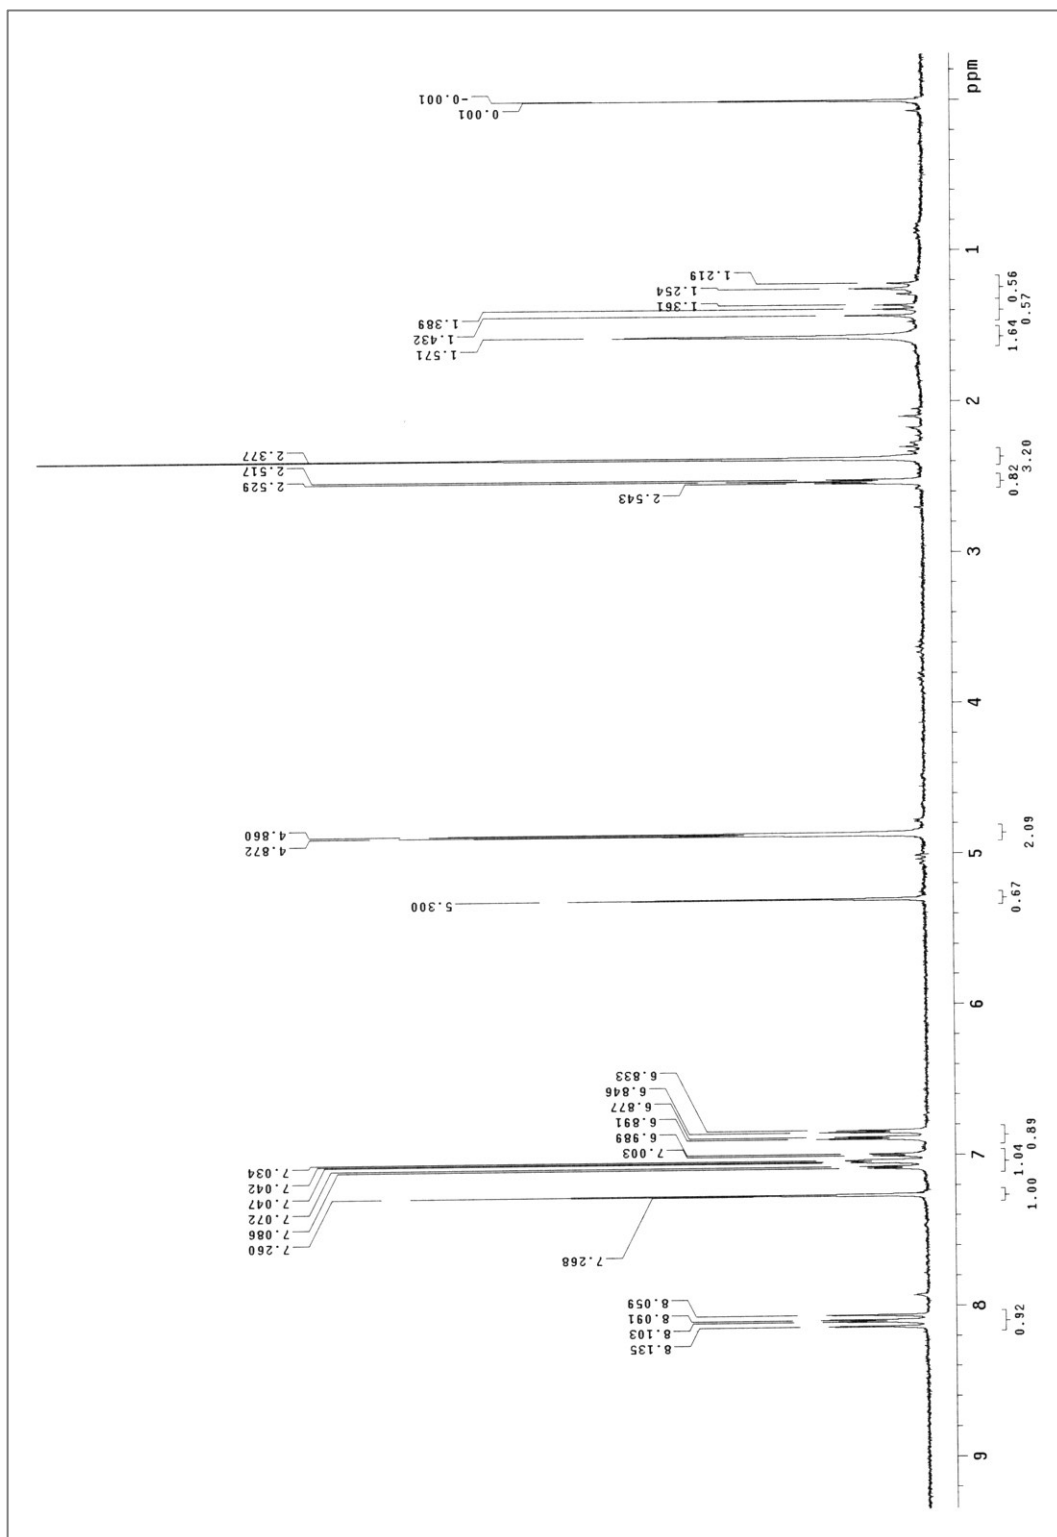

Supporting Figure S7:  $^1\text{H}$  NMR spectrum of propargyl-5F-ASS

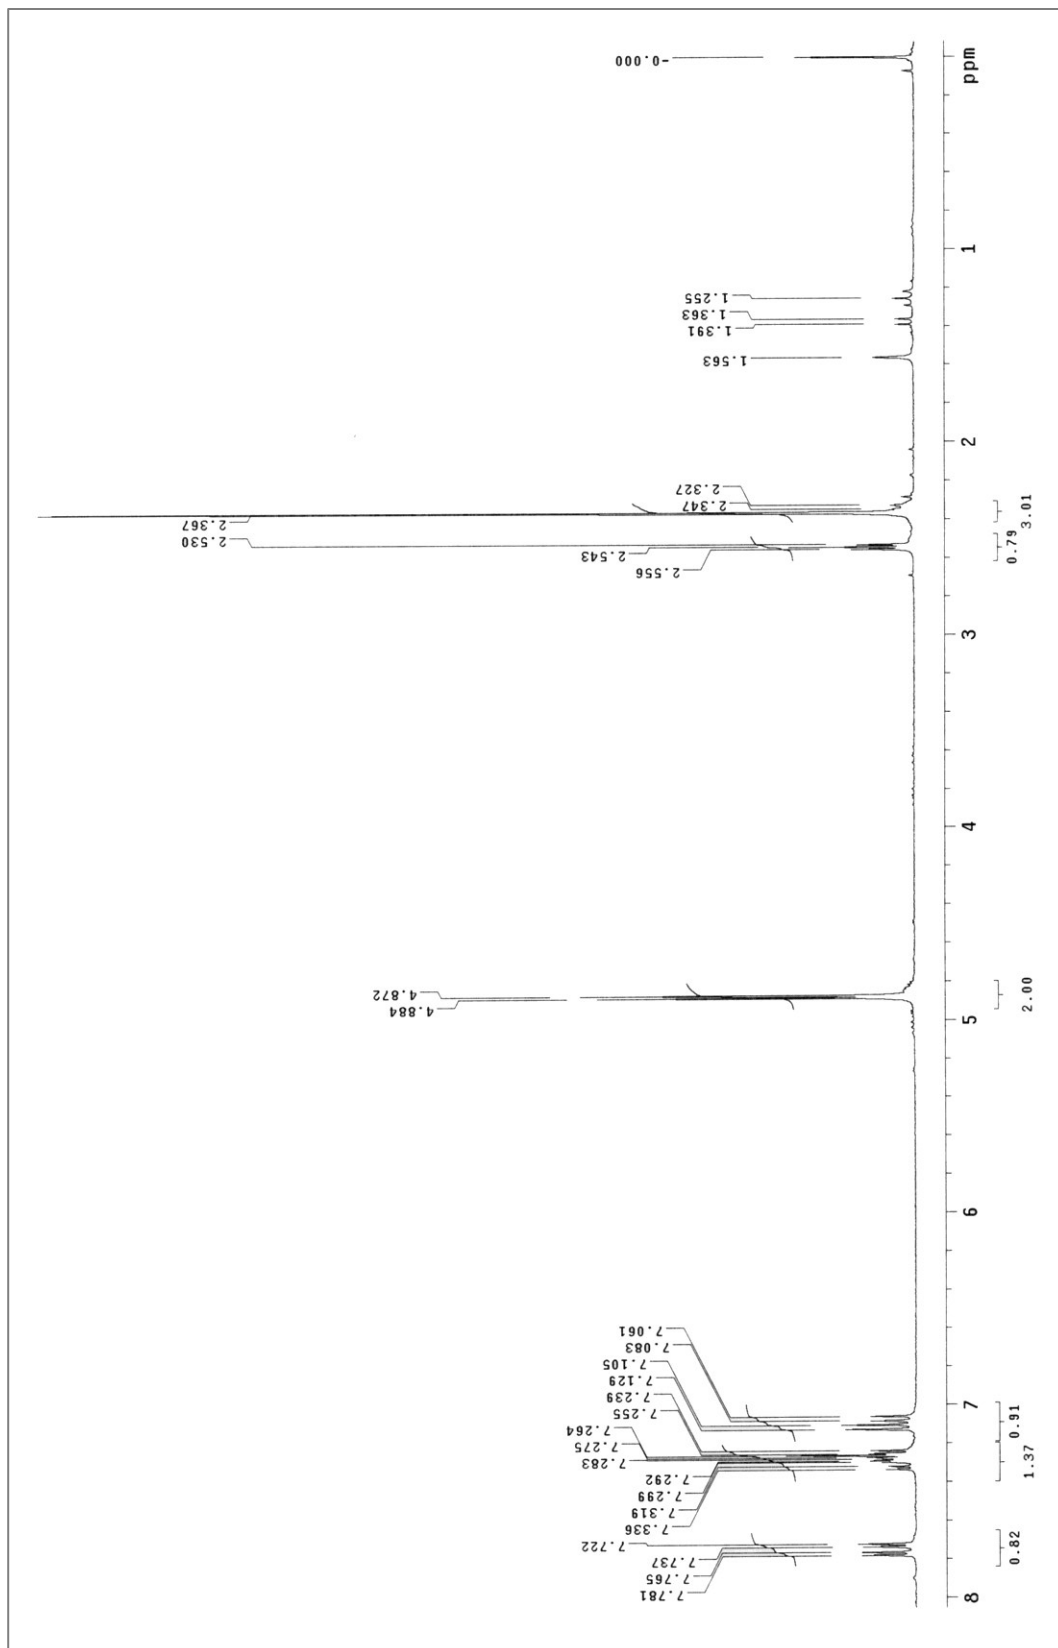

Supporting Figure S8:  $^1\text{H}$  NMR spectrum of propargyl-6F-ASS

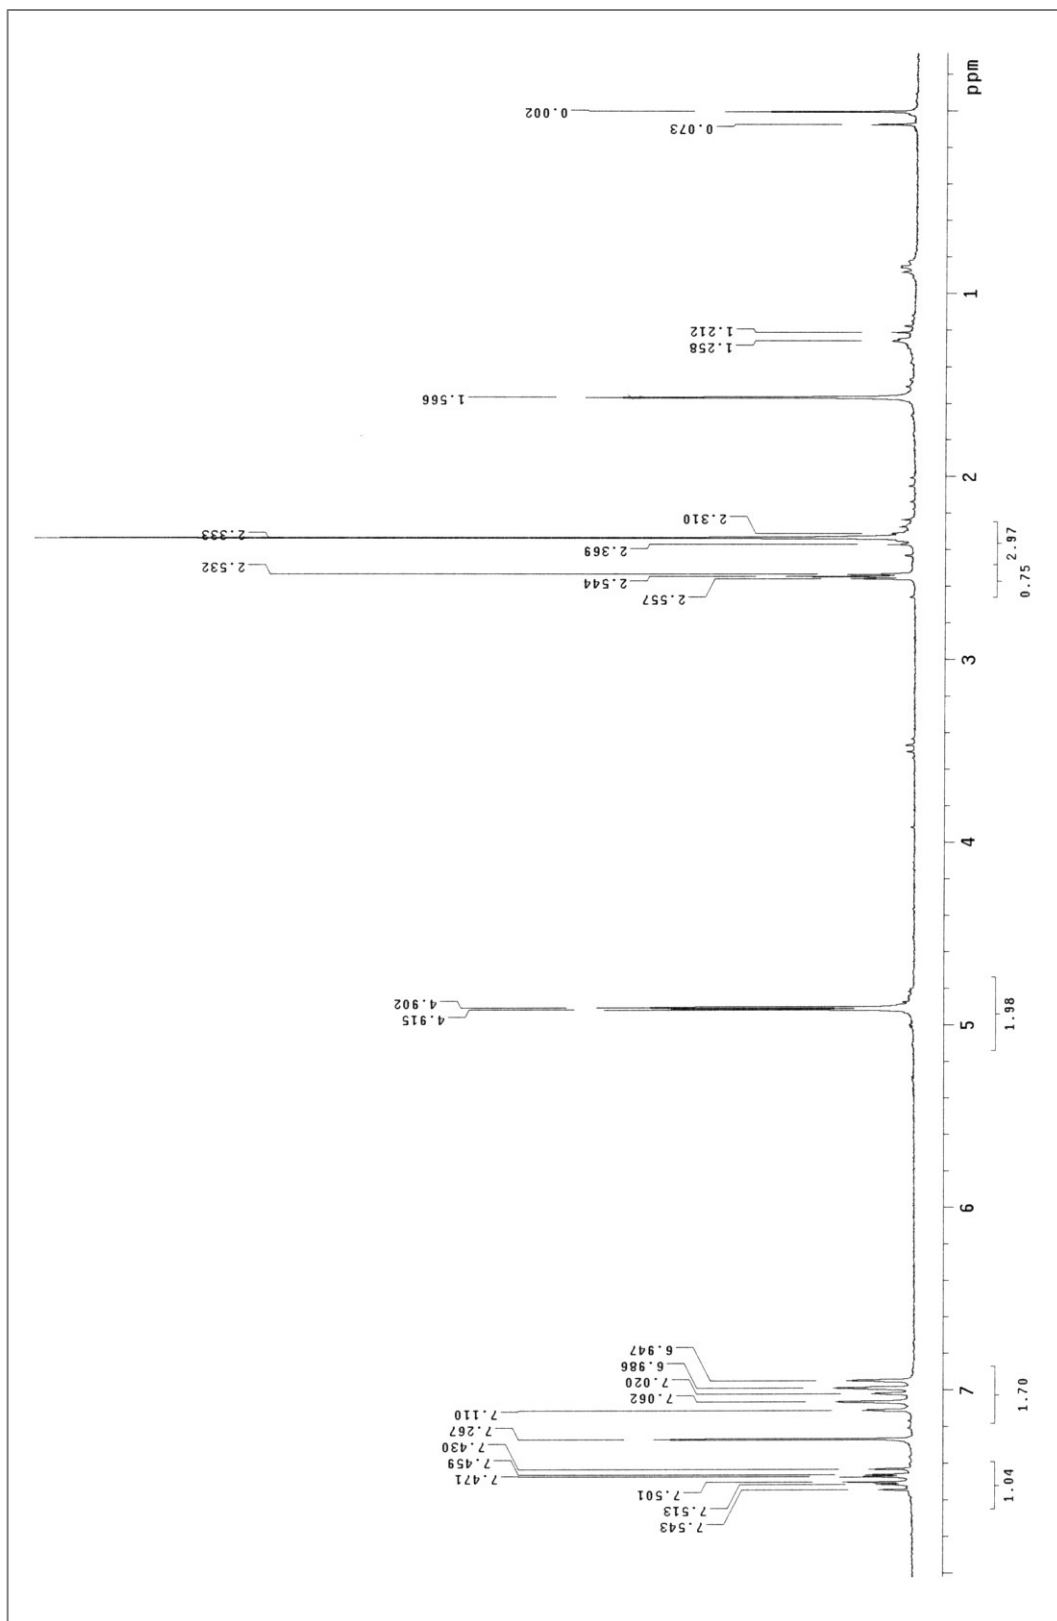

Supporting Figure S9: IR spectrum of 3F-Co-ASS

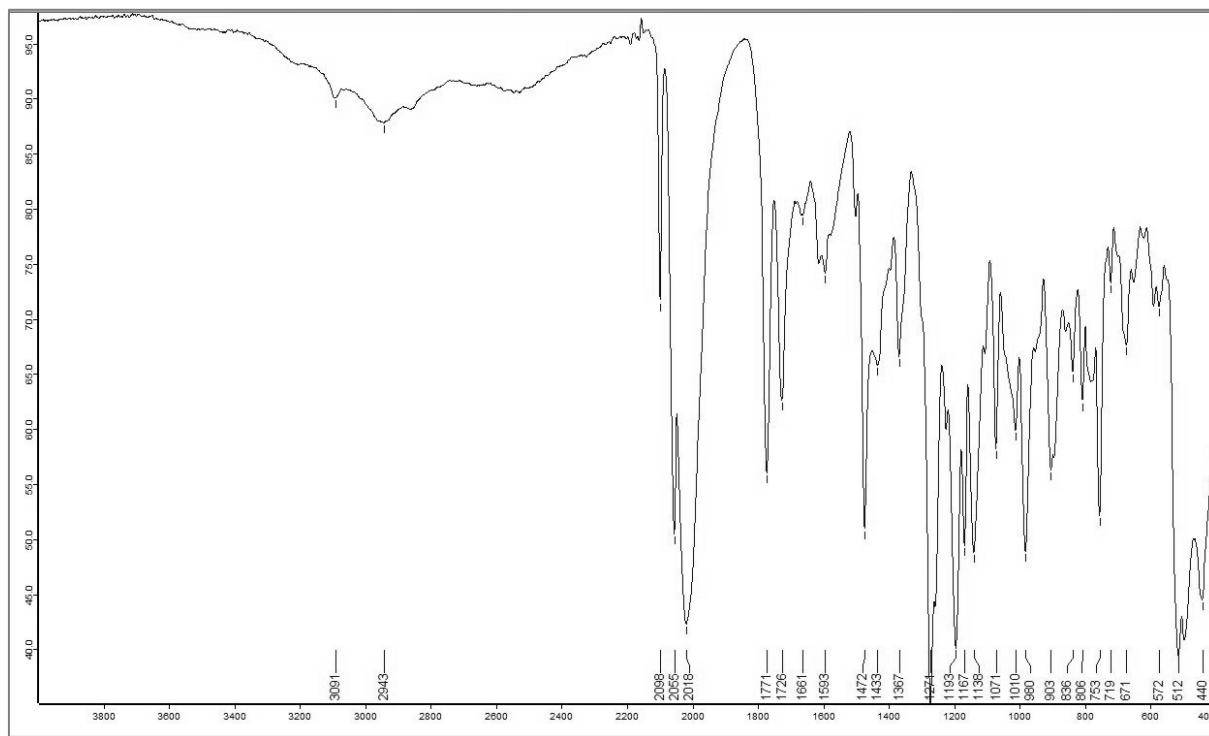

Supporting Figure S10: IR spectrum of 4F-Co-ASS

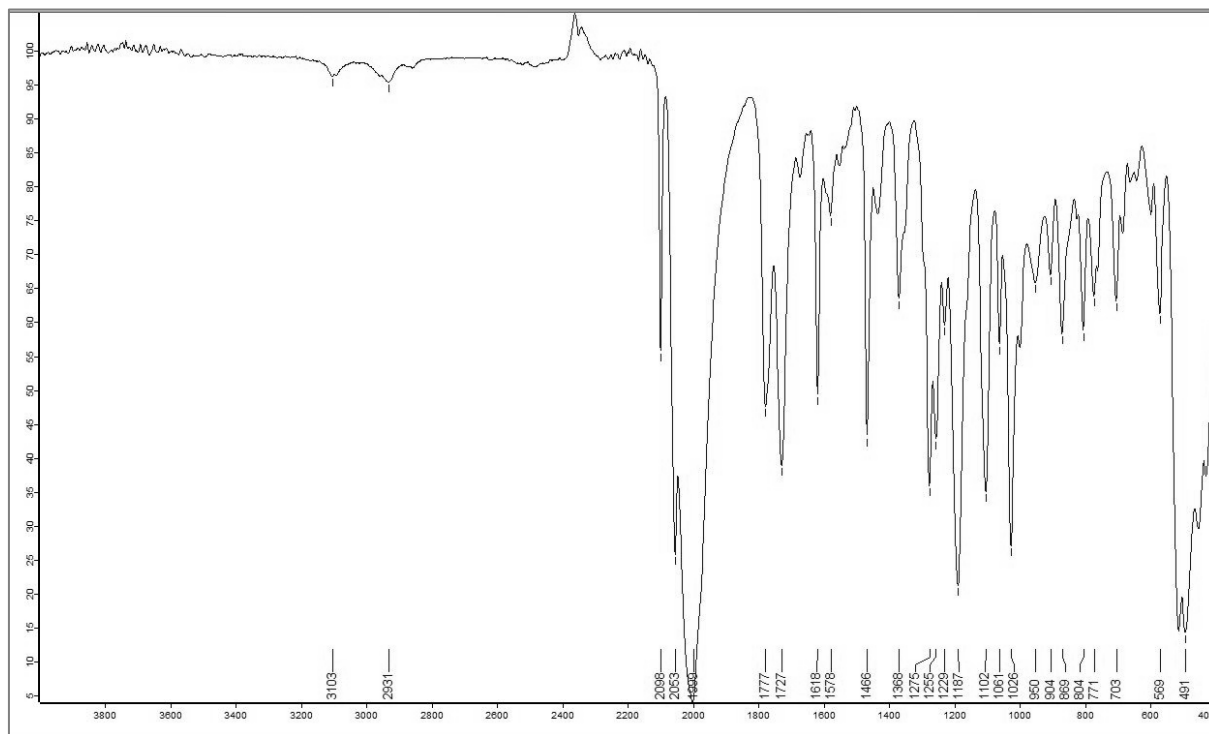

Supporting Figure S11: IR spectrum of 5F-Co-ASS

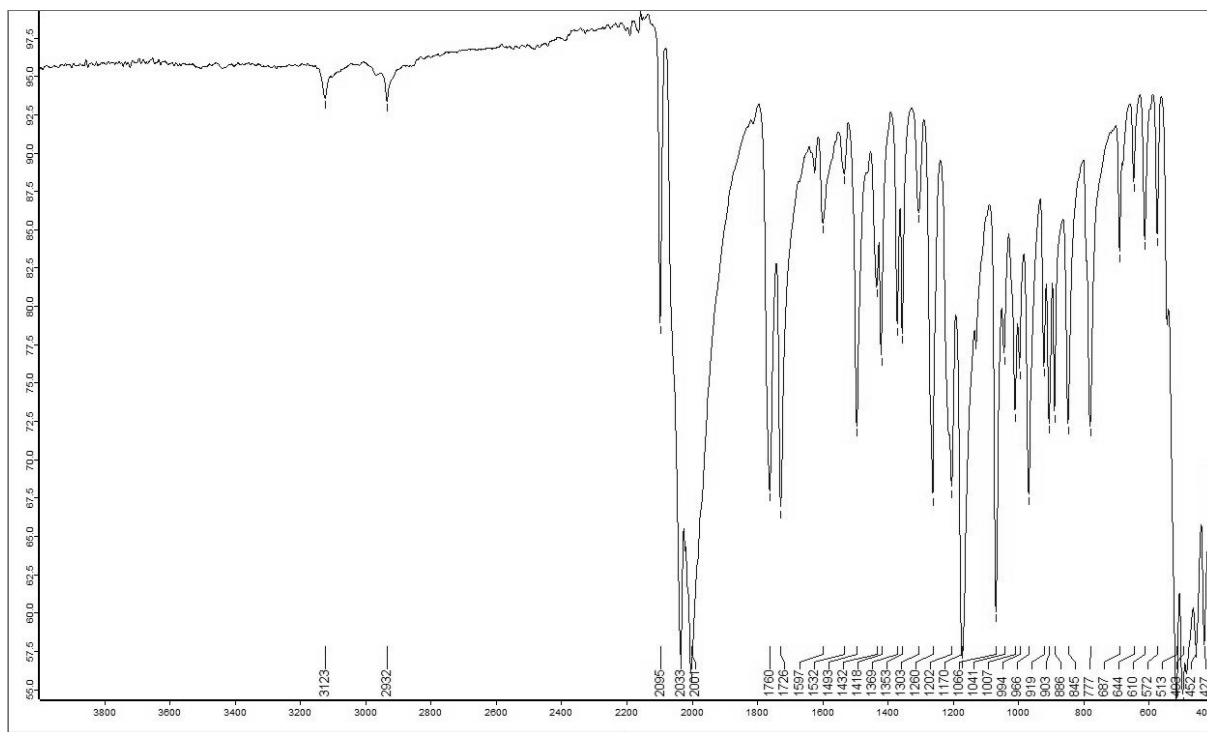

Supporting Figure S12: IR spectrum of 6F-Co-ASS

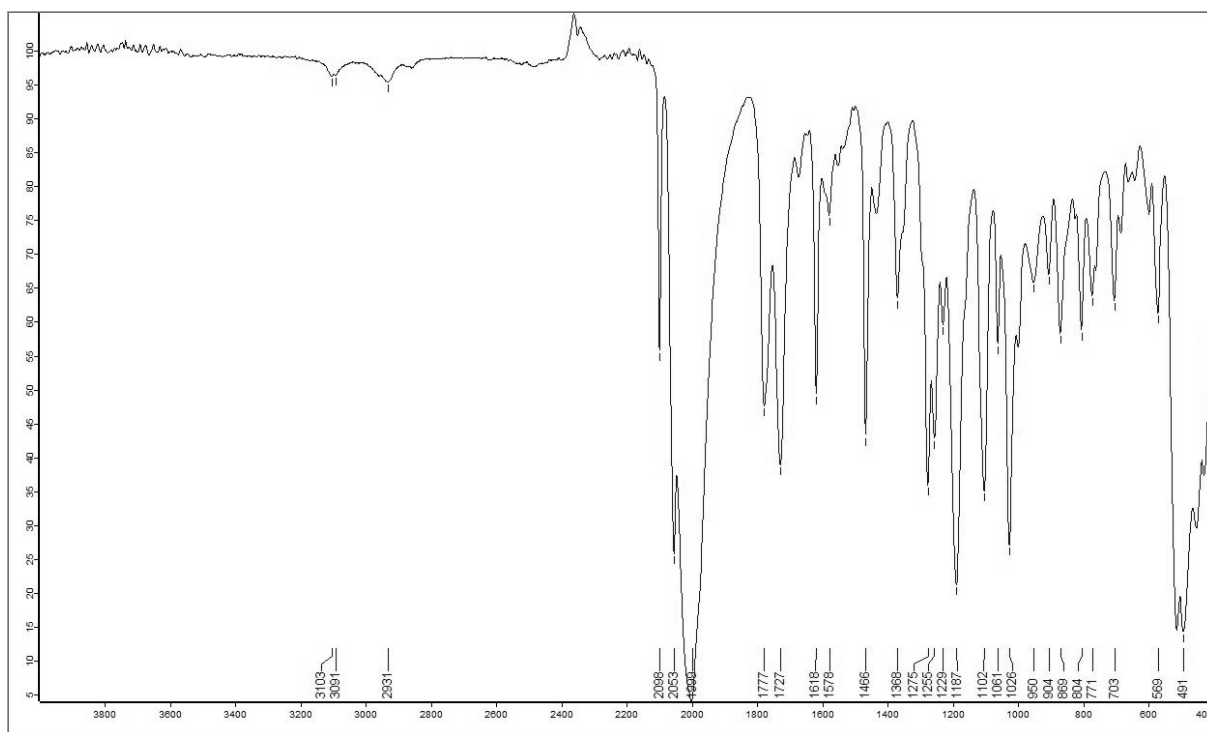

Supporting Figure S13:  $^1\text{H}$ -NMR spectrum of 3F-Co-ASS

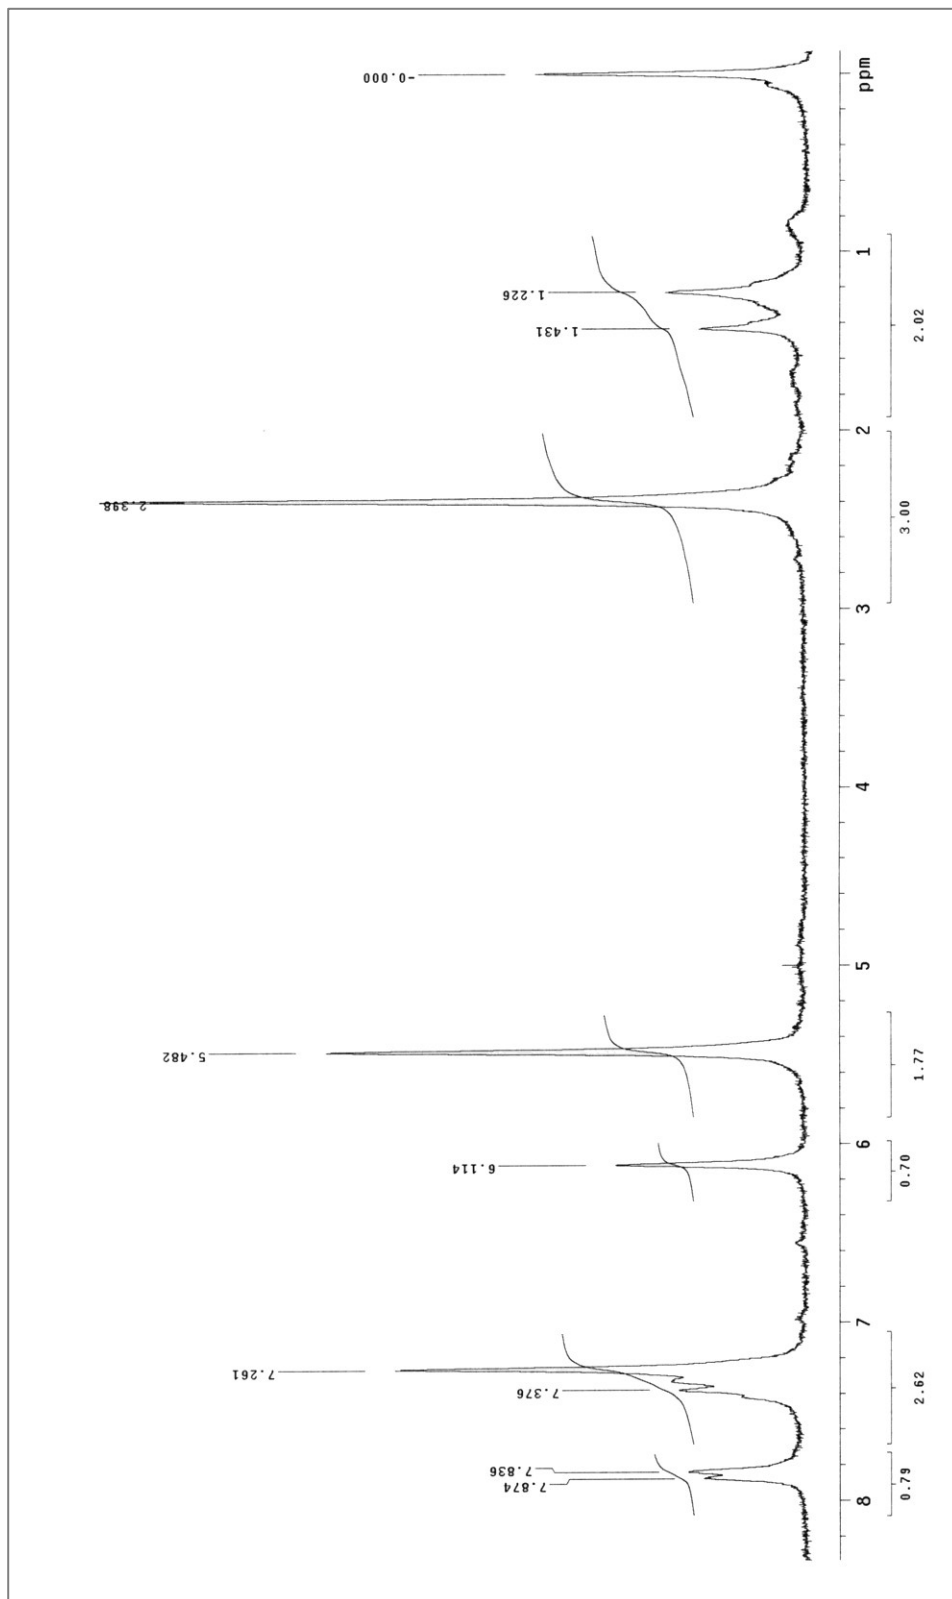

Supporting Figure S14:  $^1\text{H}$  NMR spectrum of 4F-Co-ASS

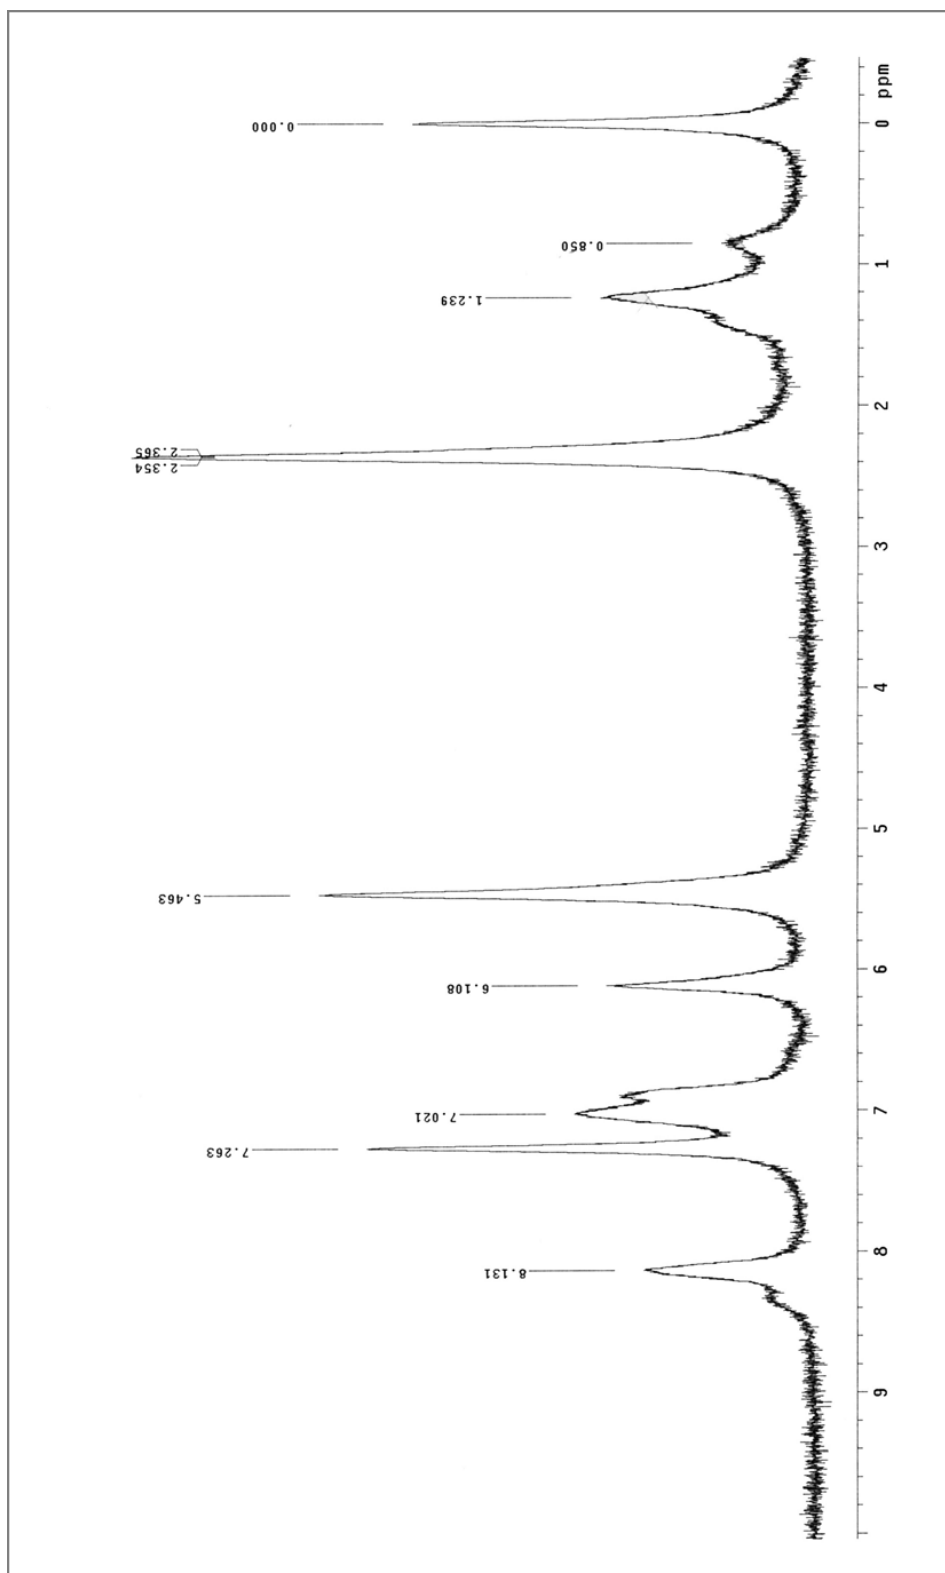

Supporting Figure S15:  $^1\text{H}$  NMR spectrum of 5F-Co-ASS

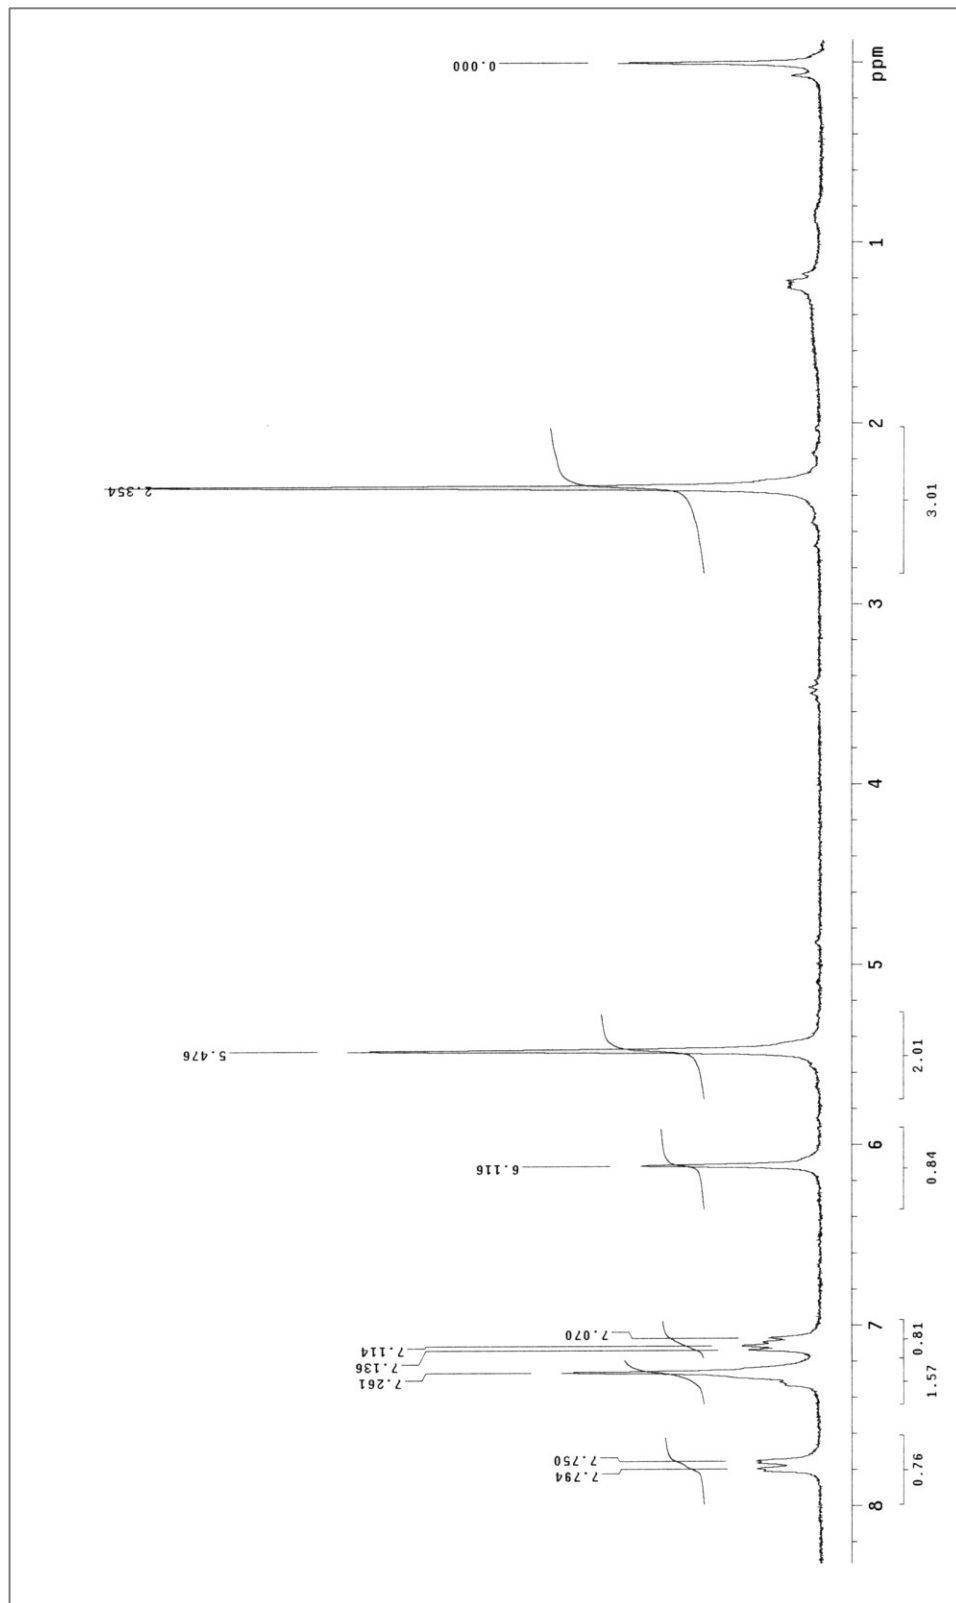



Supporting Figure S16:  $^1\text{H}$  NMR spectrum of 6F-Co-ASS

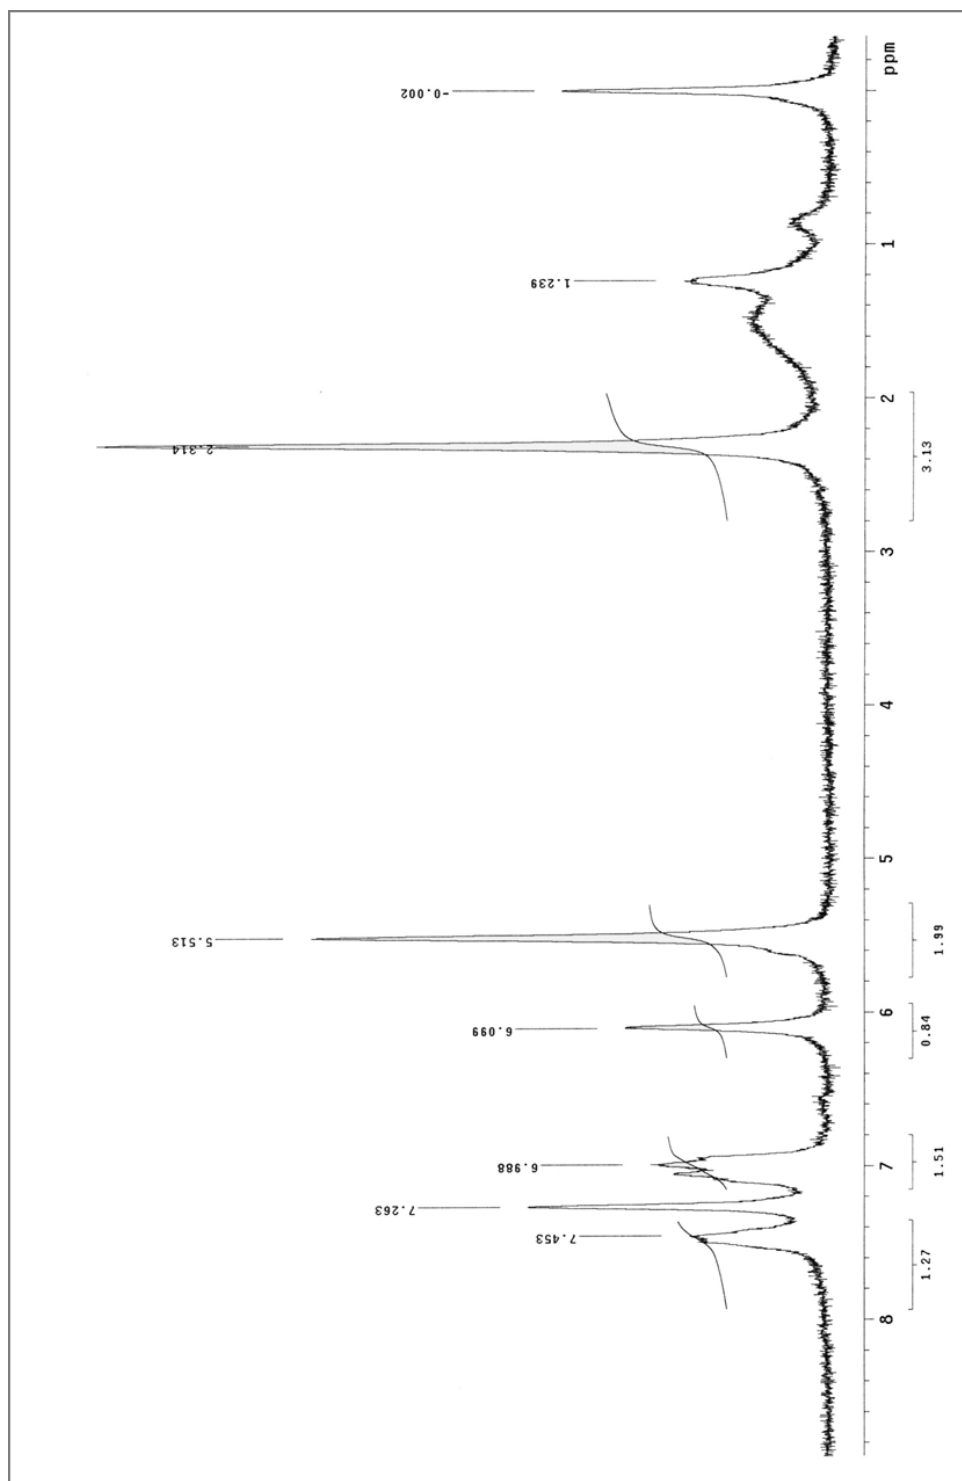

Supplement: c9dt03330k1.pdf [file c9dt03330k1.pdf]
